# Supplementary material for: Do All Roads Lead to Rome? The Potential of Different Approaches to Diagnose Aelurostrongylus abstrusus Infection in Cats
Source: MDPI journal article supplement (doi:10.3390/pathogens10050602), 2021-05-14
Supplement: s1 [file s1]

**Supplementary Table 2.** Detailed study data on the age of the cats at the day of infection, type of inoculum (fresh *Aelurostrongylus abstrusus* L3 from the day of snail digestion or L3 allowed to migrate overnight through a Baermann funnel after snail digestion) as well as data of CT/XRAY examinations and anthelmintic treatment with emodepside/praziquantel. Note that cat A3 deceased on day 168 pi. Abbreviations: L3 = third-stage larvae; CT = computed tomography; XRAY = radiography; dpi = days post infection.

| <b>Cat</b>                                         | <b>A1</b>      | <b>A2</b>      | <b>A3</b>      | <b>B1</b>         | <b>B2</b>         | <b>B3</b>         |
|----------------------------------------------------|----------------|----------------|----------------|-------------------|-------------------|-------------------|
| <b>Age at infection (month)</b>                    | 37             | 38             | 105            | 37                | 13                | 13                |
| <b>Inoculum</b>                                    | 300 L3 (fresh) | 300 L3 (fresh) | 300 L3 (fresh) | 300 L3 (migrated) | 300 L3 (migrated) | 300 L3 (migrated) |
| <b>1<sup>st</sup> CT/X-RAY (dpi)</b>               | 0              | 0              | 0              | 0                 | 0                 | 0                 |
| <b>2<sup>nd</sup> CT/XRAY (dpi)</b>                | 84             | 84             | 84             | 84                | 84                | 84                |
| <b>3<sup>rd</sup> CT/XRAY (dpi)</b>                | 126            | 129            | 129            | 126               | 126               | 126               |
| <b>4<sup>th</sup> CT/XRAY (dpi)</b>                | 171            | 173            |                | 171               | 171               | 171               |
| <b>1<sup>st</sup> Anthelmintic treatment (dpi)</b> | 171            | 173            |                | 171               | 171               | 171               |
| <b>2<sup>nd</sup> Anthelmintic treatment (dpi)</b> | 185            | 187            |                | 185               | 185               | 185               |
| <b>5<sup>th</sup> CT/XRAY (dpi)</b>                | 213            | 210            |                | 213               | 209               | 209               |
| <b>6<sup>th</sup> CT/XRAY (dpi)</b>                |                | 249            |                | 256               | 252               | 252               |
| <b>7<sup>th</sup> CT/XRAY (dpi)</b>                |                |                |                |                   | 294               |                   |
| <b>8<sup>th</sup> CT/XRAY (dpi)</b>                |                |                |                |                   | 337               |                   |
