# Supplementary material for: Do All Roads Lead to Rome? The Potential of Different Approaches to Diagnose Aelurostrongylus abstrusus Infection in Cats
Source: MDPI journal article supplement (doi:10.3390/pathogens10050602), 2021-05-14
Supplement: s1 [file s1]

**Supplementary Table 1.** Results of the respiratory assessment during the course of experimental *Aelurostrongylus abstrusus* infection and after anthelmintic treatment with emodepside/praziquantel at days 171/173 (first treatment) and 185/187 pi (second treatment). The intensity of respiratory sounds during auscultation was scored between 0 (no sound) and 3 (severe sound). Abnormal quality of respiratory sounds as well as coughing or retching were noted if observed. The days after all cats received the first treatment are marked in grey. Note that cat A3 deceased on day 168 pi. Abbreviations: dpi = days post infection; - = omitted; IRD = increased respiratory depth; CR = crackle; W = wheeze.

| dpi /<br>Cat | Respiratory rate/min |    |    |    |    |    | Intensity |     |    |    |    |    | Quality |     |     |     |     |     | Coughing/retching |    |    |    |     |    |
|--------------|----------------------|----|----|----|----|----|-----------|-----|----|----|----|----|---------|-----|-----|-----|-----|-----|-------------------|----|----|----|-----|----|
|              | A1                   | A2 | A3 | B1 | B2 | B3 | A1        | A2  | A3 | B1 | B2 | B3 | A1      | A2  | A3  | B1  | B2  | B3  | A1                | A2 | A3 | B1 | B2  | B3 |
| 18           | -                    | 40 | 52 | -  | 28 | 32 | -         | 0   | 1  | -  | 0  | -  | -       |     |     | -   |     |     | -                 |    |    | -  |     |    |
| 21           | -                    | 28 | 30 | -  | 36 | 36 | -         | 0   | 1  | -  | 1  | -  | -       | CR  |     | -   |     | IRD | -                 |    |    | -  | Yes |    |
| 25           | 48                   | 36 | 28 | 48 | 52 | 64 | 1-2       | 1-2 | 1  | 1  | 1  | 1  |         | IRD |     |     | IRD | IRD |                   |    |    |    |     |    |
| 28           | 32                   | 28 | 32 | 40 | 66 | 54 | 1-2       | 1   | 1  | 1  | 1  | 1  | IRD     |     |     | IRD | IRD | IRD |                   |    |    |    |     |    |
| 32           | 40                   | 40 | 48 | 28 | 66 | 54 | 1         | 1   | 1  | 1  | 1  | 1  | IRD     |     |     |     | IRD | IRD |                   |    |    |    |     |    |
| 35           | 30                   | 54 | 84 | 28 | 42 | 60 | 1         | 0   | 1  | 1  | 1  | 1  |         |     | IRD |     | IRD | W   |                   |    |    |    |     |    |
| 39           | 44                   | 54 | 48 | 40 | 54 | 48 | 1         | 1   | 1  | 2  | 1  | 1  | IRD     |     | IRD | IRD | IRD | IRD |                   |    |    |    |     |    |
| 42           | 54                   | 44 | 60 | 42 | 54 | 52 | 1         | 0   | 1  | 1  | 1  | 2  |         |     |     | IRD | IRD | IRD |                   |    |    |    |     |    |
| 46           | 54                   | 54 | 48 | 48 | 48 | 48 | 1         | 0   | 1  | 1  | 2  | 1  | IRD     |     | IRD | IRD | IRD | IRD |                   |    |    |    |     |    |
| 49           | 42                   | 44 | 66 | 36 | 52 | 56 | 1         | 0   | 0  | 1  | 1  | 1  | IRD     |     |     | IRD | IRD | IRD |                   |    |    |    |     |    |
| 53           | 44                   | 56 | 54 | 52 | 52 | 42 | 1         | 0   | 1  | 1  | 1  | 2  | IRD     |     | IRD | IRD | IRD | IRD |                   |    |    |    |     |    |
| 56           | 52                   | 66 | 54 | 48 | 60 | 42 | 1         | 1   | 1  | 1  | 1  | 1  |         | IRD | IRD | IRD | IRD | IRD |                   |    |    |    |     |    |
| 60           | 44                   | 48 | 44 | 36 | 48 | 52 | 1         | 0   | 1  | 1  | 1  | 1  | IRD     |     | IRD | IRD | IRD |     |                   |    |    |    |     |    |
| 63           | 48                   | 36 | 48 | 52 | 40 | 48 | 1         | 0   | 1  | 1  | 1  | 1  | IRD     |     | IRD | IRD | IRD | IRD |                   |    |    |    |     |    |
| 67           | 44                   | 32 | 44 | 48 | 52 | 44 | 1         | 0   | 1  | 1  | 1  | 1  |         |     | IRD |     | IRD | IRD |                   |    |    |    |     |    |
| 70           | 54                   | 36 | 64 | 36 | 48 | 48 | 1         | 0   | 1  | 1  | 2  | 2  | IRD     |     | IRD | IRD | IRD | IRD |                   |    |    |    |     |    |
| 74           | 40                   | 36 | 48 | 60 | 72 | 66 | 1         | 0   | 1  | 1  | 2  | 2  |         |     | IRD |     | IRD | IRD |                   |    |    |    |     |    |
| 77           | 44                   | 52 | 60 | 52 | 44 | 52 | 1-2       | 0   | 1  | 1  | 1  | 2  | CR      |     |     | IRD |     | IRD | Yes               |    |    |    |     |    |
| 81           | 40                   | 60 | 54 | 44 | 48 | 48 | 1         | 0   | 2  | 1  | 1  | 1  |         |     | IRD | IRD |     | IRD |                   |    |    |    |     |    |
| 84           | 48                   | 52 | 56 | 44 | 32 | 40 | 1         | 0   | 2  | 1  | 1  | 1  | IRD     |     | IRD |     |     | IRD |                   |    |    |    |     |    |
| 88           | 66                   | 32 | 44 | 84 | 48 | 40 | 2         | 0   | 1  | 2  | 1  | 1  | IRD     |     | IRD | IRD |     | IRD |                   |    |    |    |     |    |
| 91           | 44                   | 36 | 54 | 52 | 60 | 52 | 1         | 0   | 1  | 2  | 1  | 1  | IRD     |     |     |     |     | IRD | Yes               |    |    |    |     |    |
| 95           | 44                   | 44 | 52 | 32 | 52 | 32 | 1         | 1   | 1  | 1  | 1  | 1  |         |     | IRD | IRD |     | IRD |                   |    |    |    |     |    |

|     |    |    |    |    |    |    |   |   |   |     |   |     |     |     |     |     |     |     |     |     |   |   |   |
|-----|----|----|----|----|----|----|---|---|---|-----|---|-----|-----|-----|-----|-----|-----|-----|-----|-----|---|---|---|
| 98  | 56 | 54 | 48 | 48 | 48 | 44 | 1 | 0 | 1 | 1   | 1 | 1   | IRD |     | IRD | IRD | IRD |     |     |     |   |   |   |
| 102 | 36 | 44 | 48 | 52 | 40 | 44 | 1 | 1 | 1 | 1   | 1 | 1   |     |     | IRD | IRD |     | IRD |     |     |   |   |   |
| 104 | -  | -  | -  | -  | 60 | 60 | - | - | - | -   | 1 | 1   | -   | -   | -   | -   | IRD | IRD | -   | -   | - | - | - |
| 105 | 54 | 54 | 54 | 60 | -  | -  | 0 | 1 | 1 | 1   | - | -   |     |     | IRD | IRD | -   | -   |     |     | - | - |   |
| 109 | 48 | 36 | 52 | 52 | 45 | 44 | 1 | 0 | 1 | 1   | 1 | 1   | IRD |     | IRD | IRD |     | IRD |     |     |   |   |   |
| 111 | -  | 60 | 72 | -  | 60 | 68 | - | 0 | 1 | -   | 1 | 2   | -   |     | IRD | -   |     | IRD |     |     | - |   |   |
| 112 | 64 | -  | -  | 40 | -  | -  | 1 | - | - | 1   | - | -   | IRD | -   | -   | IRD |     | -   |     | -   | - | - | - |
| 116 | 48 | 40 | 32 | 40 | 40 | 44 | 1 | 0 | 1 | 1   | 1 | 2   | IRD |     | IRD | IRD |     | IRD |     | Yes |   |   |   |
| 118 | 52 | 72 | 66 | 60 | 54 | 54 | 2 | 1 | 1 | 2   | 2 | 2   |     | IRD | IRD |     |     | IRD |     |     |   |   |   |
| 123 | 44 | 36 | 48 | 52 | 48 | 48 | 1 | 1 | 1 | 1   | 1 | 1-2 |     |     | IRD | IRD |     | IRD |     |     |   |   |   |
| 125 | 54 | 48 | 54 | 66 | 54 | 44 | 1 | 0 | 2 | 1   | 1 | 1   |     |     |     |     |     |     |     |     |   |   |   |
| 130 | 32 | 32 | 44 | 64 | 52 | 48 | 1 | 0 | 1 | 1   | 1 | 1   | IRD |     | IRD |     | IRD | IRD |     |     |   |   |   |
| 132 | 60 | 46 | 54 | 60 | 40 | 48 | 1 | 1 | 1 | 1   | 1 | 1   |     |     |     |     | IRD | IRD |     |     |   |   |   |
| 137 | 40 | 52 | 48 | 60 | 48 | 52 | 1 | 1 | 1 | 1   | 1 | 1   |     |     | IRD | IRD | IRD | IRD |     |     |   |   |   |
| 139 | 46 | 44 | 48 | 44 | -  | -  | 1 | 0 | 1 | 1   | - | -   |     |     |     |     | -   | -   |     |     | - | - |   |
| 140 | -  | -  | -  | -  | 58 | 48 | - | - | - | -   | 1 | 0   | -   | -   | -   | -   | IRD |     |     | -   | - | - | - |
| 144 | 32 | 44 | 44 | 44 | 48 | 56 | 0 | 1 | 1 | 1   | 1 | 1-2 |     |     | IRD | IRD |     | IRD |     |     |   |   |   |
| 146 | 48 | -  | -  | 44 | -  | -  | 1 | - | - | 1   | - | -   | IRD | -   | -   | IRD | -   | -   |     | -   | - | - | - |
| 147 | -  | 52 | 48 | -  | 48 | 44 | - | 1 | 0 | -   | 1 | 1   | -   | IRD |     | -   | IRD | IRD |     | -   |   |   |   |
| 151 | 48 | 40 | 48 | 52 | 28 | 48 | 1 | 0 | 1 | 1   | 1 | 1   |     |     | IRD | IRD |     | IRD |     |     |   |   |   |
| 154 | 44 | 44 | 52 | 40 | 48 | 52 | 1 | 1 | 1 | 1   | 1 | 1   | IRD |     |     | IRD |     |     |     |     |   |   |   |
| 158 | 44 | 32 | 56 | 32 | 40 | 60 | 1 | 1 | 1 | 1   | 1 | 1   | IRD | IRD |     |     |     |     | IRD |     |   |   |   |
| 160 | -  | -  | -  | -  | 40 | 60 | - | - | - | -   | 1 | 0   | -   | -   | -   | -   | IRD |     |     | -   | - | - | - |
| 161 | 56 | 48 | 60 | 48 | -  | -  | 1 | 1 | 1 | 1-2 | - | -   | IRD | IRD |     | IRD | -   | -   |     |     | - | - |   |
| 165 | 42 | 36 | 48 | 48 | 54 | 66 | 1 | 1 | 1 | 1   | 0 | 0   |     |     | IRD |     |     |     |     |     |   |   |   |
| 167 | -  | 44 | 48 | -  | -  | -  | - | 1 | 0 | -   | - | -   | -   | IRD |     | -   | -   | -   |     | -   |   | - | - |
| 168 | 52 | -  |    | 48 | 56 | 48 | 1 | - |   | 1   | 0 | 0   |     | -   |     |     |     |     |     | -   |   |   |   |
| 172 | 44 | 42 |    | 56 | 48 | 42 | 1 | 1 |   | 1   | 1 | 1-2 |     |     |     |     |     | IRD |     |     |   |   |   |
| 174 | 40 | -  |    | 64 | -  | -  | 1 | - |   | 1   | - | -   | IRD | -   |     | IRD | -   | -   |     | -   |   | - | - |
| 175 | -  | 40 |    | -  | 42 | 32 | - | 1 |   | -   | 0 | 1   | -   | IRD |     | -   |     | IRD |     | -   |   |   |   |

|     |    |    |    |    |    |   |   |   |   |   |     |   |     |     |     |   |
|-----|----|----|----|----|----|---|---|---|---|---|-----|---|-----|-----|-----|---|
| 179 | 66 | 48 | 54 | 66 | 62 | 1 | 1 | 1 | 1 | 1 | IRD |   |     |     |     |   |
| 182 | 44 | 48 | 40 | 46 | 55 | 1 | 0 | 1 | 0 | 1 | IRD |   | IRD |     |     |   |
| 186 | 42 | 42 | 60 | 54 | 60 | 0 | 0 | 1 | 1 | 2 |     |   | IRD | IRD |     |   |
| 189 | 42 | 52 | 32 | 60 | 54 | 0 | 1 | 0 | 1 | 1 |     |   |     |     |     |   |
| 193 | 46 | 42 | 54 | 66 | 42 | 1 | 1 | 1 | 0 | 0 |     |   |     |     |     |   |
| 196 | 62 | 48 | 42 | 52 | 48 | 0 | 1 | 0 | 1 | 1 |     |   |     |     |     |   |
| 200 | 54 | 42 | 60 | 52 | 48 | 1 | 0 | 1 | 1 | 1 |     |   |     |     |     |   |
| 202 | -  | -  | -  | 62 | 40 | - | - | - | 0 | 0 | -   | - | -   | -   | -   | - |
| 203 | 54 | 44 | 54 | -  | -  | 1 | 0 | 1 | - | - | IRD |   | -   | -   | -   | - |
| 207 | 48 | 40 | 48 | 52 | 44 | 1 | 0 | 1 | 0 | 0 |     |   |     |     |     |   |
| 209 | -  | 48 | -  | -  | -  | - | 0 | - | - | - | -   |   | -   | -   | -   | - |
| 210 | 44 | -  | 48 | 40 | 48 | 0 | - | 1 | 1 | 1 |     | - |     |     | -   |   |
| 214 | 40 | 40 | 36 | 48 | 44 | 0 | 0 | 1 | 1 | 1 |     |   |     |     |     |   |
| 216 | 44 | -  | 36 | -  | -  | 0 | - | 0 | - | - |     | - |     | -   | -   | - |
| 217 | -  | 32 | -  | 54 | 54 | - | 0 | - | 0 | 0 | -   |   | -   |     | -   | - |
| 220 | -  | -  | -  | 44 | 40 | - | - | - | 1 | 1 | -   | - | -   |     | -   | - |
| 221 | 48 | 44 | 56 | -  | -  | 0 | 0 | 1 | - | - |     |   | -   | -   | -   | - |
| 224 | 32 | 36 | 56 | 62 | 55 | 0 | 0 | 0 | 0 | 0 |     |   |     |     |     |   |
| 227 | -  | 36 | -  | 66 | 60 | - | 0 | - | 0 | 0 | -   |   | -   |     | -   | - |
| 228 | 44 | -  | 56 | -  | -  | 0 | - | 1 | - | - |     | - |     | -   | -   | - |
| 231 | 66 | 54 | 54 | 42 | 48 | 0 | 0 | 0 | 0 | 0 |     |   |     |     |     |   |
| 234 | 40 | 46 | 56 | -  | -  | 0 | 0 | 1 | - | - |     |   | -   | -   | -   | - |
| 235 | -  | -  | -  | 48 | 44 | - | - | - | 0 | 0 | -   | - | -   |     | -   | - |
| 237 | -  | 42 | -  | -  | -  | - | 0 | - | - | - | -   |   | -   | -   | -   | - |
| 238 | 46 | -  | 42 | 54 | 42 | 0 | - | 0 | 1 | 1 |     | - |     |     | -   |   |
| 241 | 48 | -  | 50 | -  | -  | 0 | - | 0 | - | - |     | - |     | -   | -   | - |
| 242 | -  | 32 | -  | 48 | 40 | - | 0 | - | 1 | 1 | -   |   | -   | IRD | IRD | - |
| 245 | 60 | 42 | 48 | 48 | 56 | 0 | 1 | 0 | 0 | 0 |     |   |     |     |     |   |
| 249 | 36 | 32 | 40 | 56 | 44 | 0 | 0 | 1 | 1 | 1 |     |   |     | -   |     |   |
| 252 | 60 | 36 | 48 | 48 | 40 | 1 | 0 | 1 | 1 | 1 |     |   |     | -   |     |   |
